# Supplementary material for: Prenatal independent and combined effects of yolk vitamin E and corticosterone on embryo growth and oxidative status in the yellow-legged gull
Source: Oxford University Press journal article supplement (doi:10.1242/jeb.199265), 2019-01-01
Supplement: jeb199265supp.pdf [file jeb199265supp.pdf]

Table S1: Full statistics for the post hoc tests of differences in least squares means reported in Figures 1 and 2. CONT = control group; VitE = Vitamin E injected; CORT = corticosterone injected; VitE+CORT = injection of vitamin E and Corticosterone mixture.

|           | <b>Phenotypic trait</b> | <b>Treatment</b> | <b>P</b> |
|-----------|-------------------------|------------------|----------|
| Figure 1A | Embryo body mass        |                  |          |
|           | CONT                    | CORT             | 0.011    |
|           | VitE                    | CORT             | 0.007    |
|           | CORT                    | VitE+CORT        | 0.006    |
| Figure 1B | Tarsus length           |                  |          |
|           | CONT                    | CORT             | 0.001    |
|           | VitE                    | CORT             | <0.001   |
|           | VitE                    | VitE+CORT        | 0.018    |
|           | CORT                    | VitE+CORT        | 0.006    |
| Figure 1D | Liver mas               |                  |          |
|           | CONT                    | CORT             | <0.001   |
|           | CONT                    | VitE+CORT        | 0.023    |
|           | VitE                    | CORT             | 0.04     |
|           | CORT                    | VitE+CORT        | 0.052    |
| Figure 2B | TAC liver               |                  |          |
|           | CONT males              | VitE males       | <0.001   |
|           |                         | VitE+CORT        |          |
|           | CONT females            | females          | 0.013    |
|           | VitE males              | VitE+CORT males  | 0.019    |
|           | VitE males              | CORT males       | 0.009    |
|           | VitE males              | VitE females     | 0.016    |
|           | VitE+CORT               |                  |          |
|           | VitE+CORT males         | females          | 0.018    |
| Figure 2E | LPO brain               |                  |          |
|           | CONT                    | CORT             | 0.021    |
|           | CORT                    | VitE+CORT        | 0.003    |
